# Supplementary material
Source: MDPI journal article supplement (https://www.mdpi.com/2571-550X/1/2/14)
Supplement: s1 [file s1]

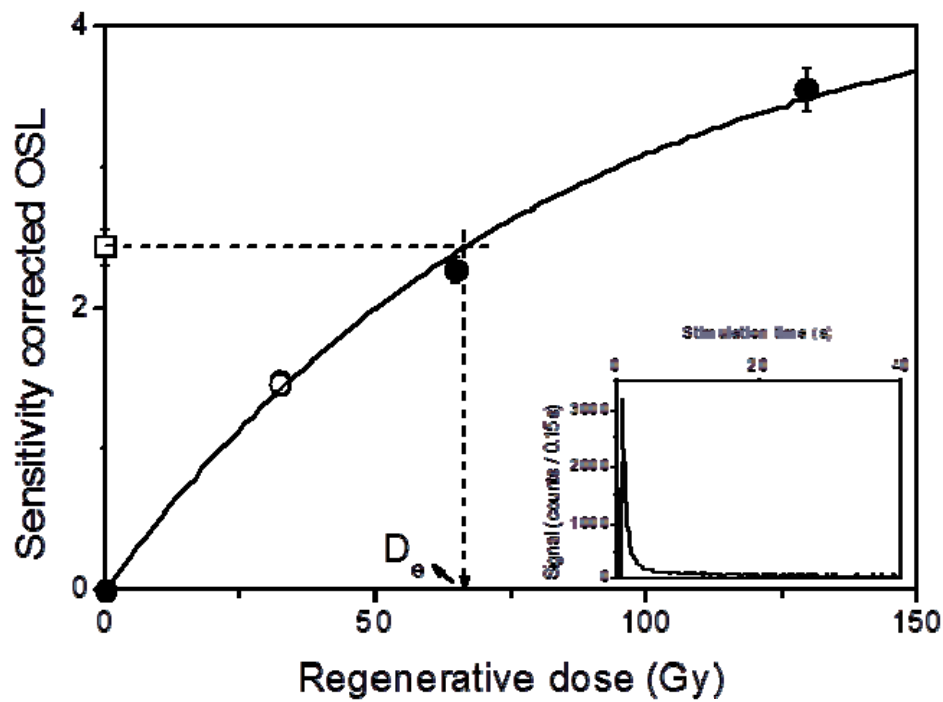

**Figure S1.** Illustrative dose-response and luminescence decay curve (inset) for an aliquot of quartz grains extracted from sample GLL-150803. The filled circles show the sensitivity-corrected responses to several regenerative doses; the dose-response (solid line) was represented by a single saturating exponential. The open circle represents a repeat measurement of the response to the regenerative dose that was administered first (recycling point). The equivalent dose ( $D_e$ ) is obtained by interpolating the sensitivity-corrected natural OSL signal (open square) on the dose-response curve.

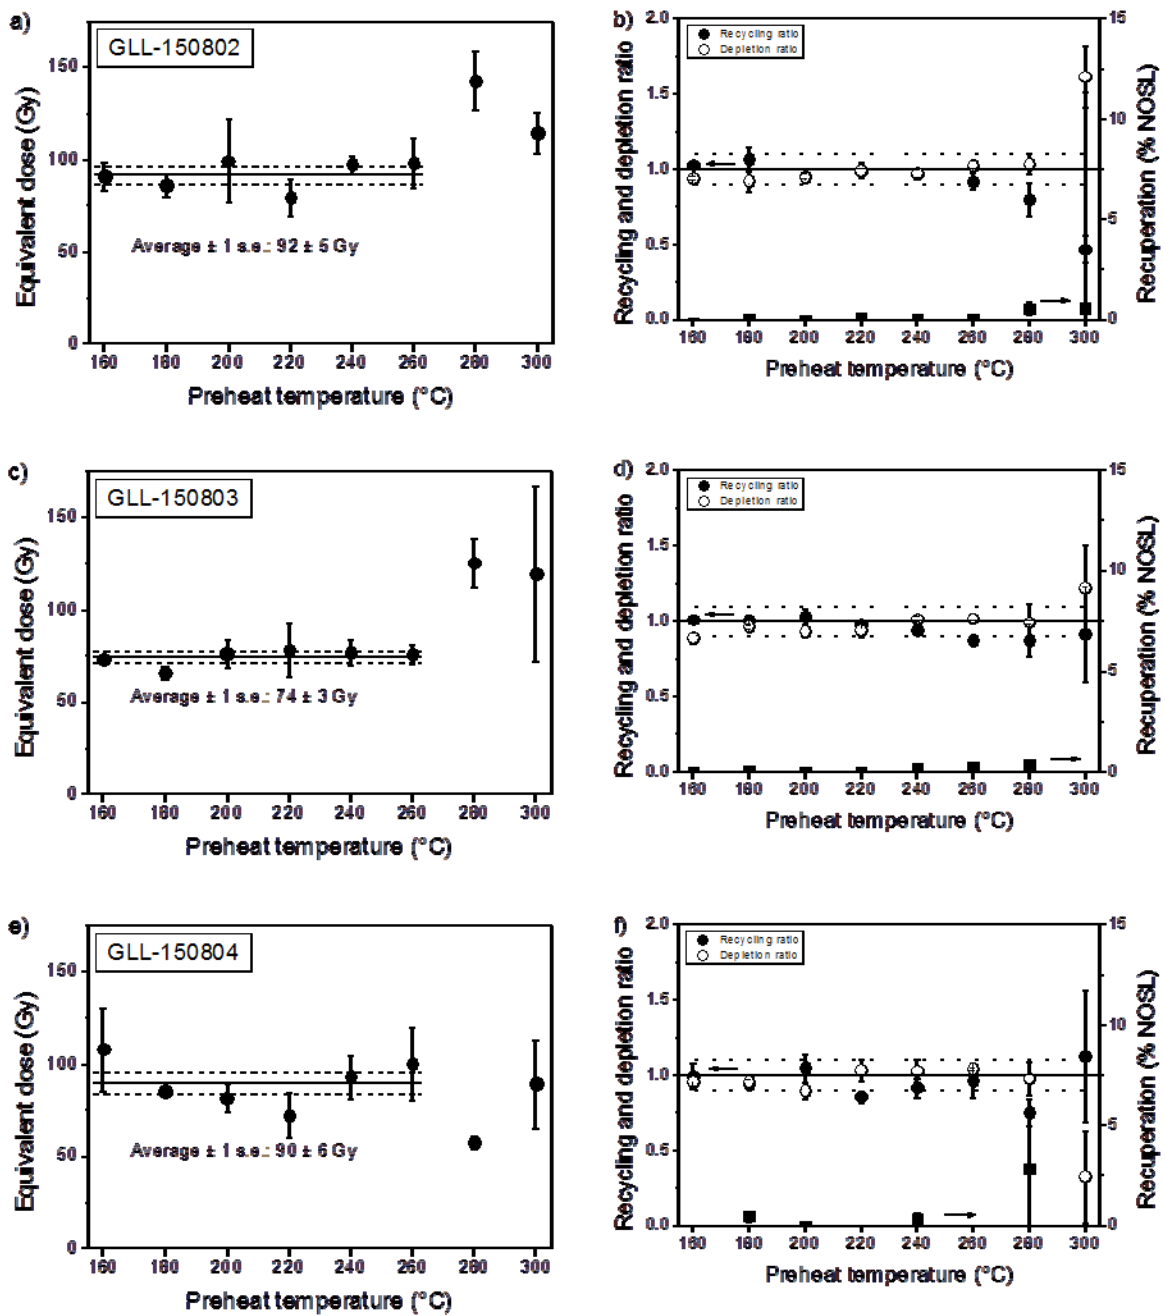

**Figure S2.** Dependence of equivalent dose on preheat temperature (a, c, e). Each data point represents the average of three measurements; error bars represent 1 standard error (s.e.). The solid and dashed lines represent the unweighted average  $\pm$  1 standard error over the 160-260°C temperature region. Figs b, d and f show the corresponding recycling (solid circles) and OSL IR depletion (open circles) ratios (left hand axis) and values for recuperation (solid squares; right hand axis) expressed as a % of the corrected natural OSL signal. The solid and dotted lines (eye guides) represent ratios equal to  $1.0 \pm 0.1$ .

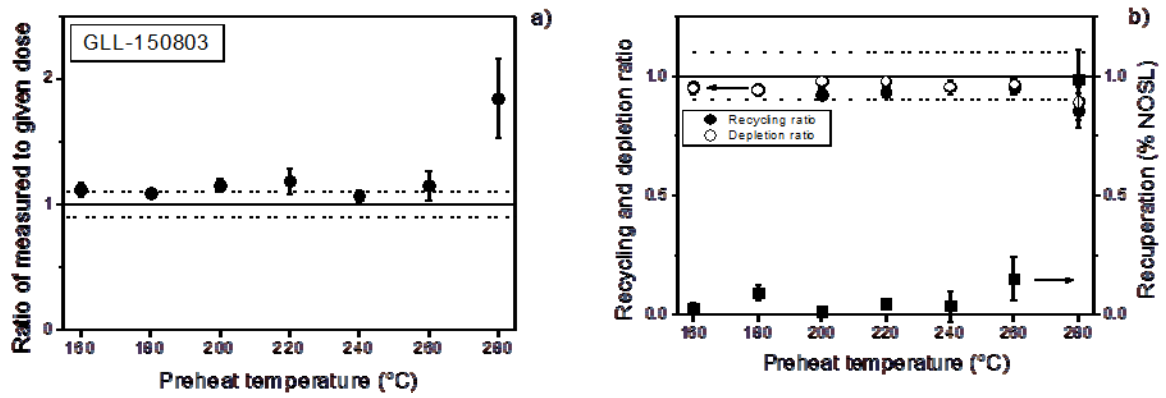

**Figure S3.** a) Ratios of measured to given dose (dose recovery data) as a function of preheat temperature for sample GLL-150803. Each data point represents the average  $\pm$  1 s.e. of three measurements. b) Corresponding recycling and OSL IR depletion ratios (left hand axis) and recuperation values (right hand axis). The solid and dotted lines (eye guides) represent ratios equal to  $1.0 \pm 0.1$ .
